# Supplementary material
Source: PubMed Central journal article supplement (PMC8792016)

Supplementary Figure

**Fig. 1A**

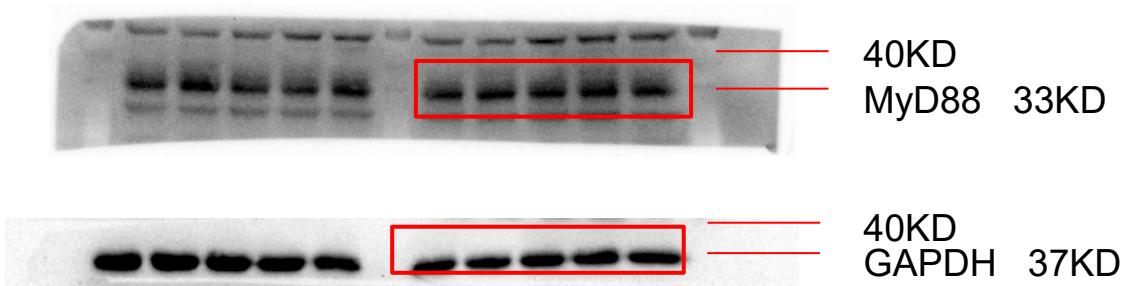

**Fig. 1B**

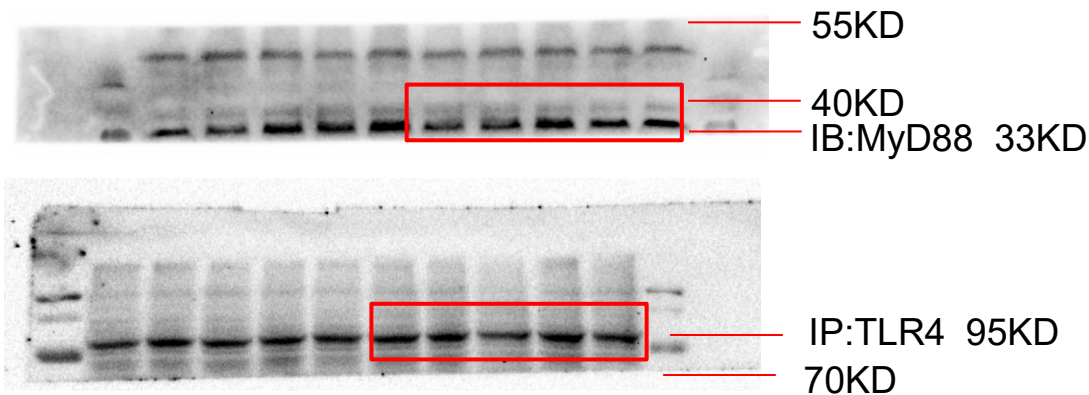

**Fig. 1D**

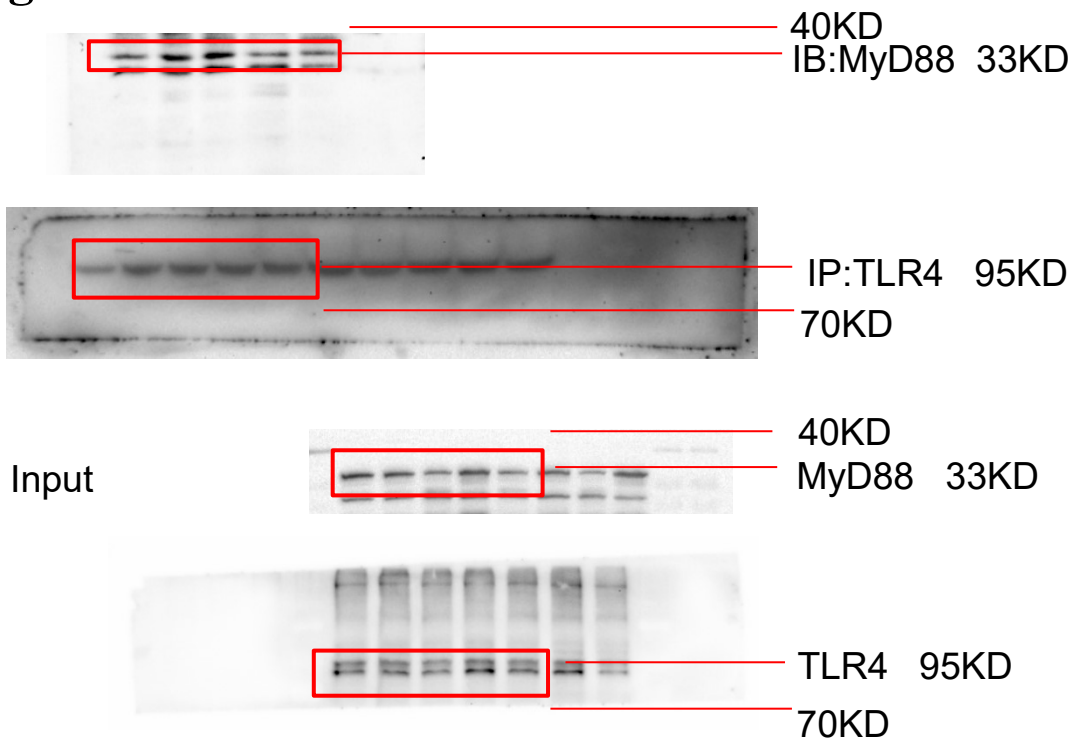

**Fig. 1E**

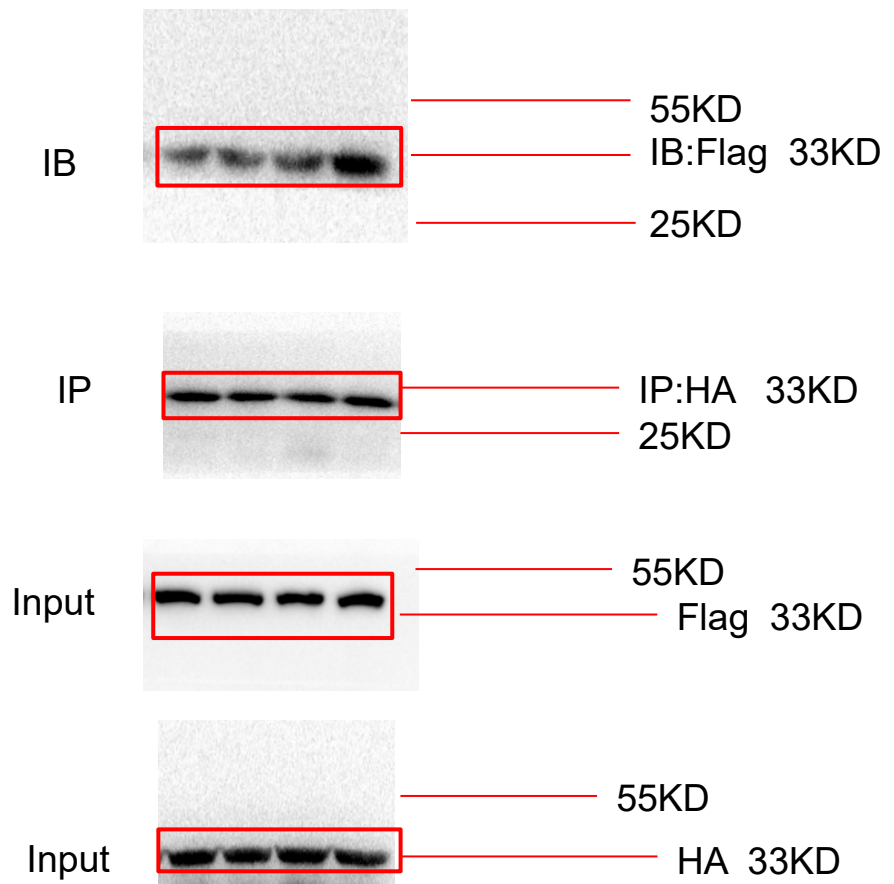

**Fig. 2A**

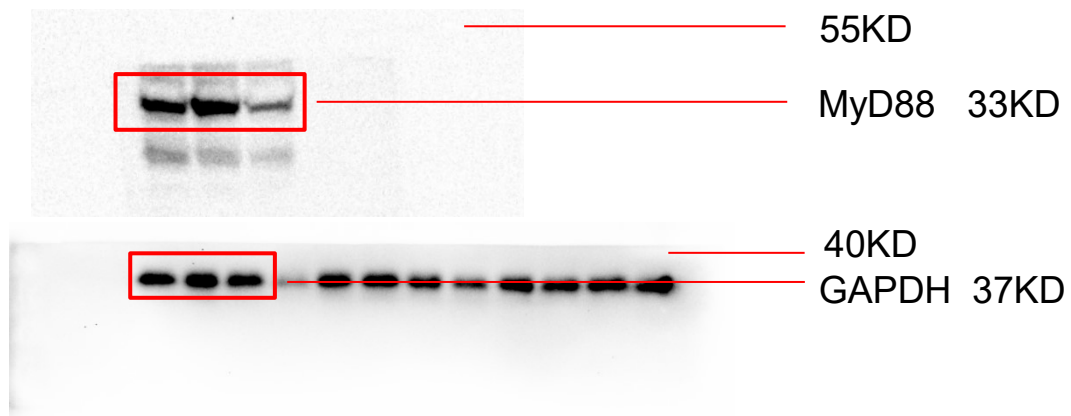

**Fig. 2B**

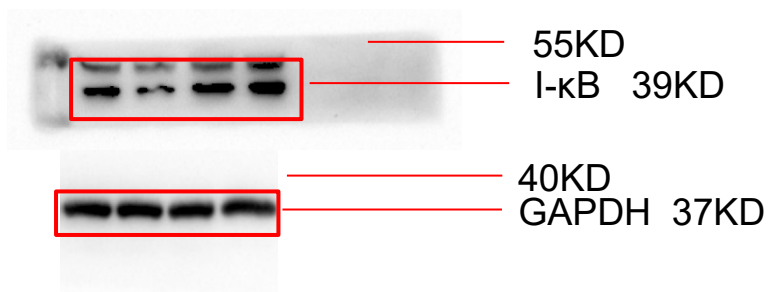

**Fig. 2G**

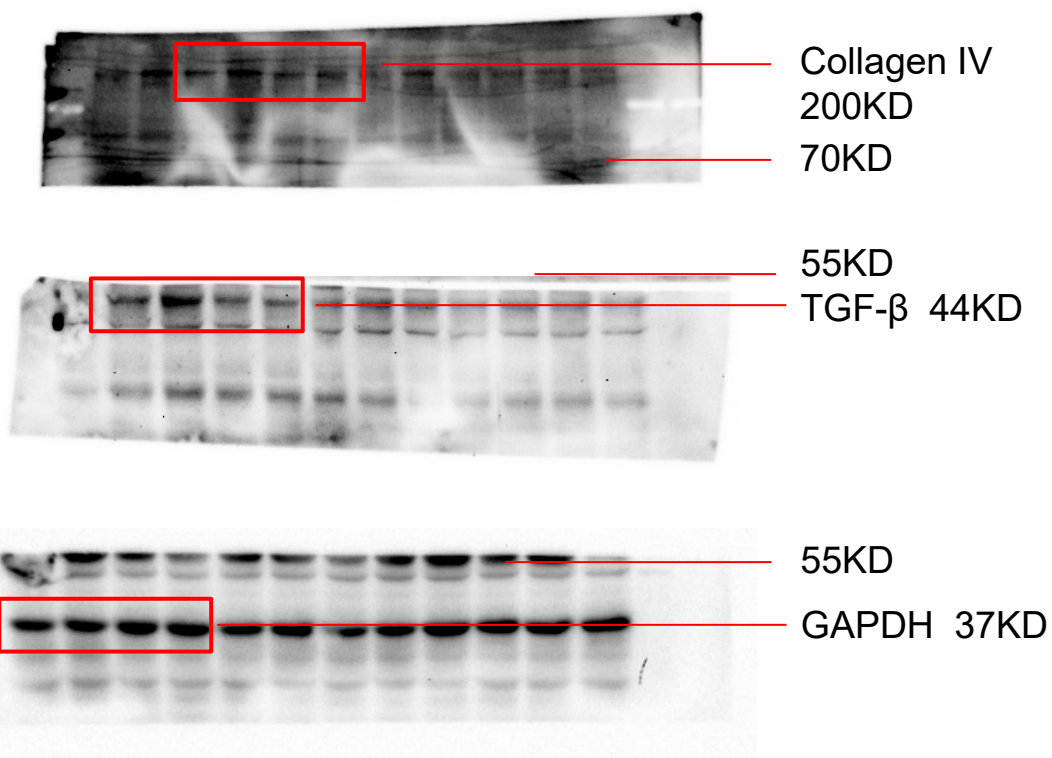

**Fig. 3D**

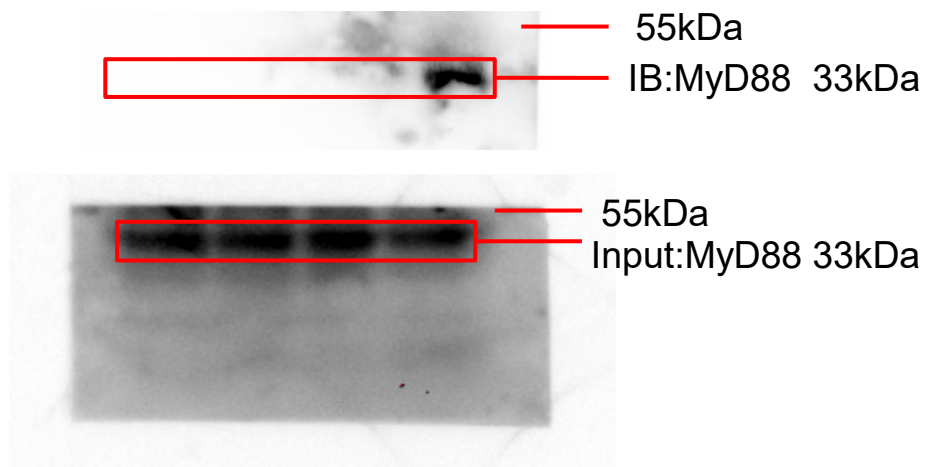

**Fig. 3E**

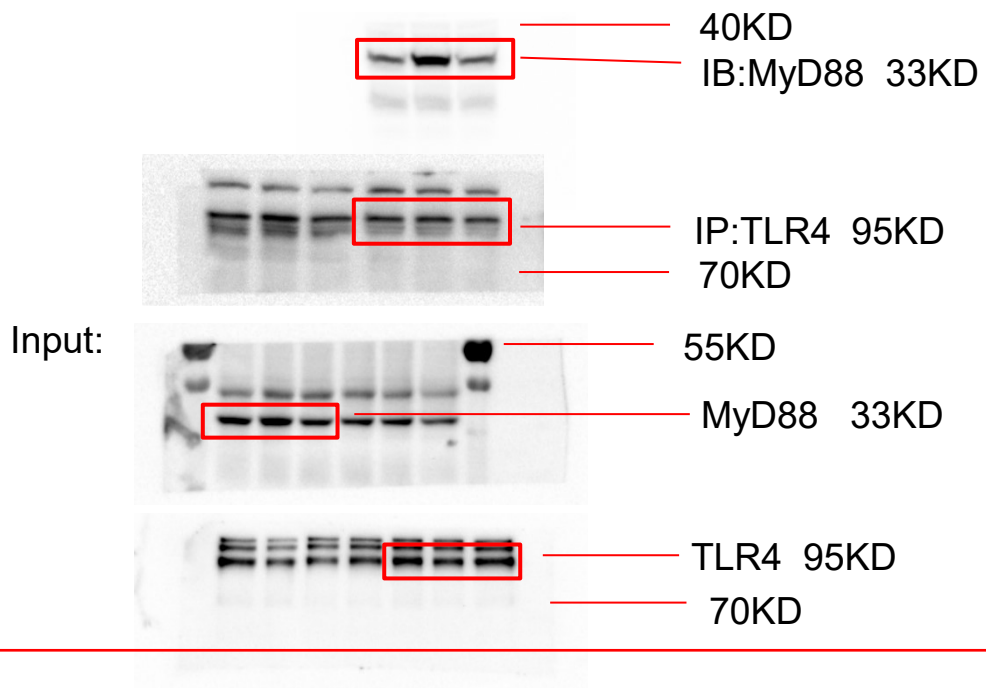

**Fig. 3F**

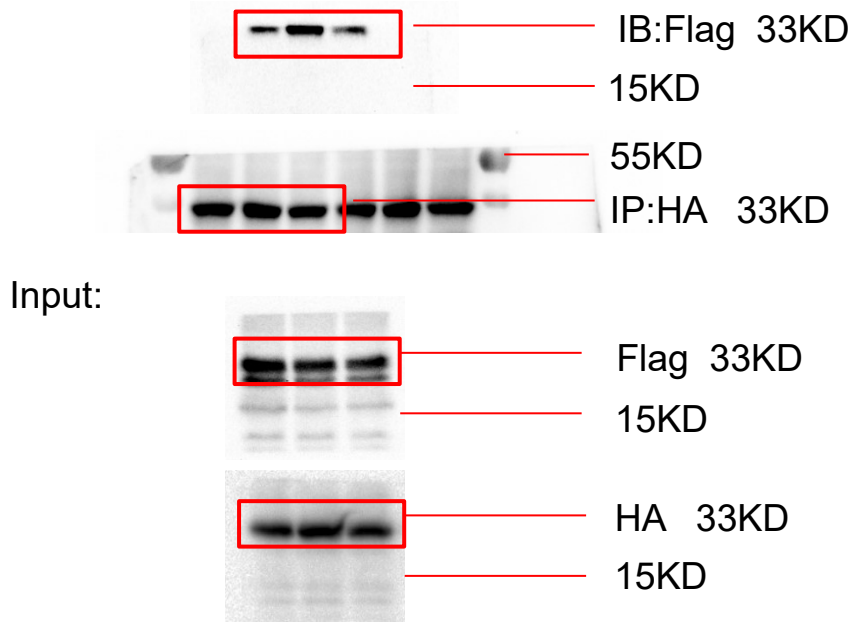

**Fig. 3G**

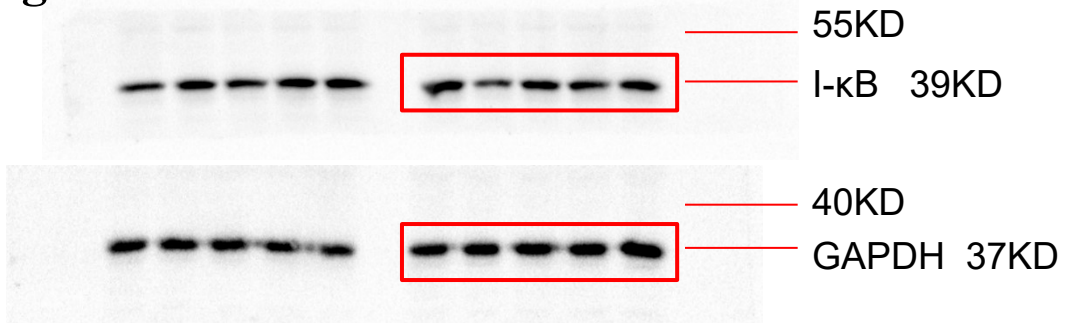

**Fig. 3L**

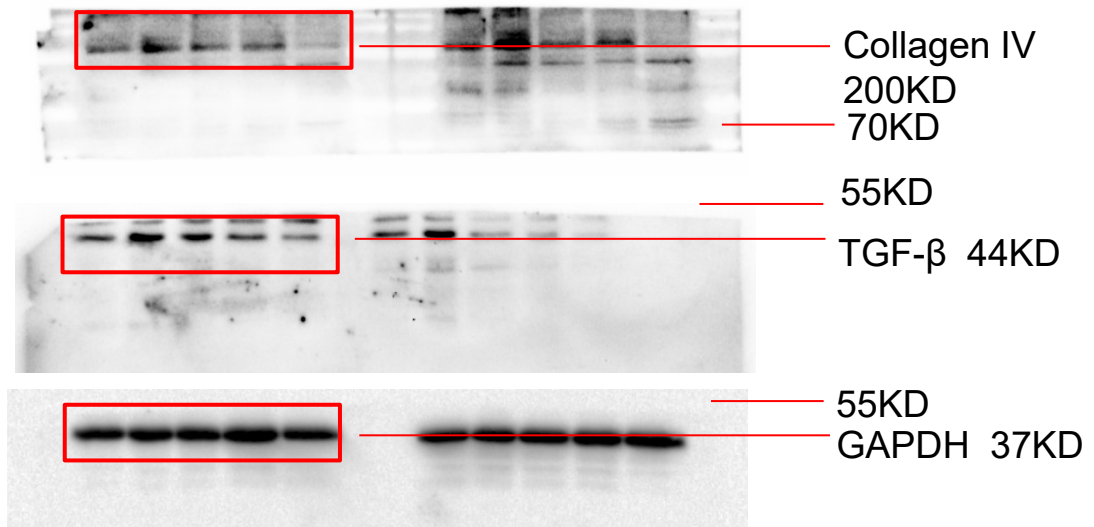

Figure 4

**Fig. 4C**

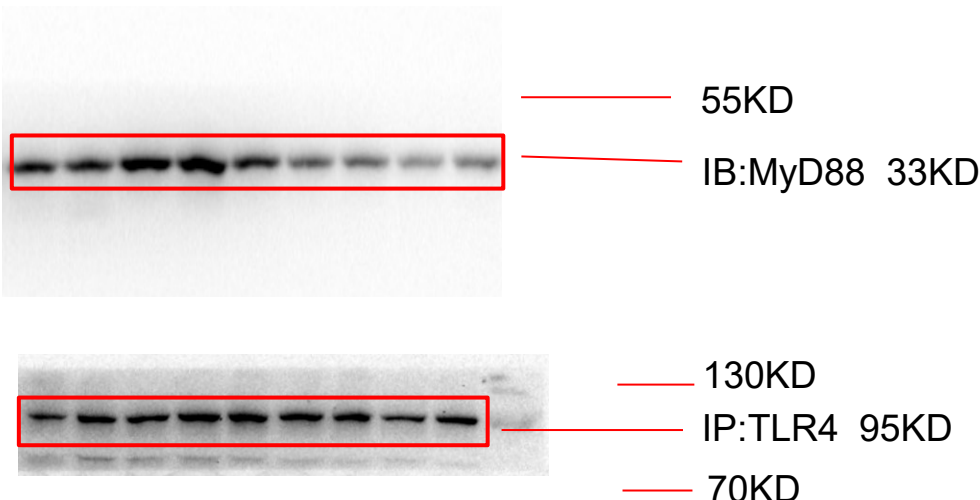

**Fig. 4D**

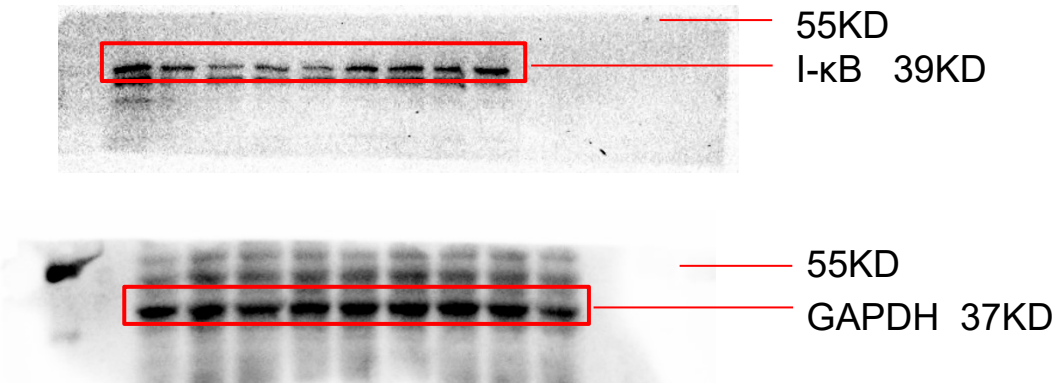

Figure 5

**Fig. 5H**

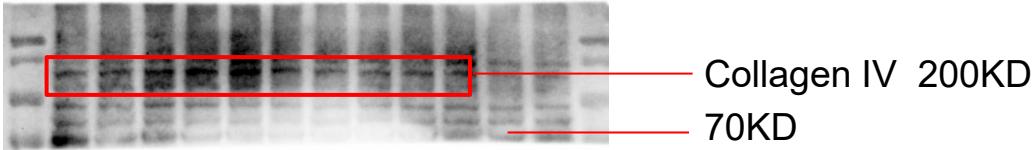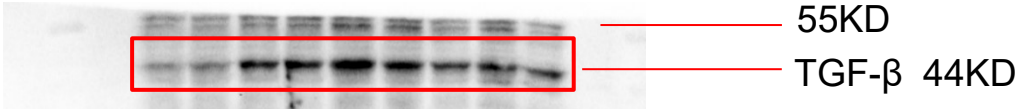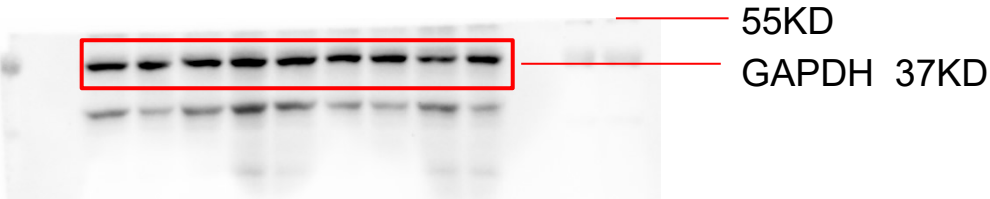

Figure 6

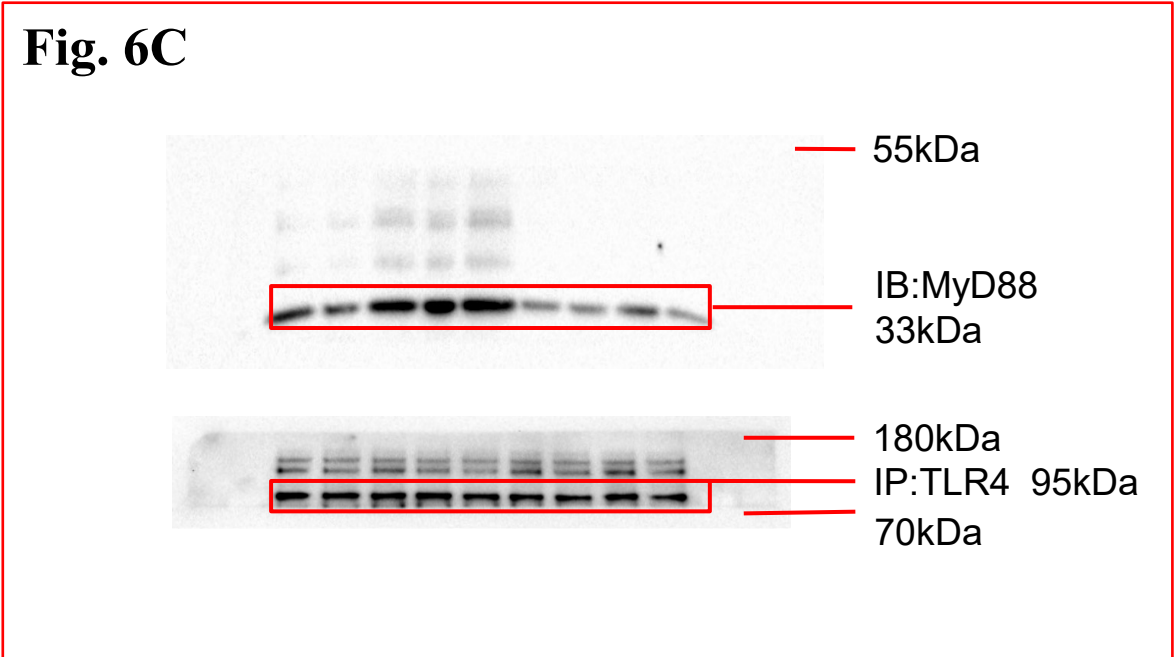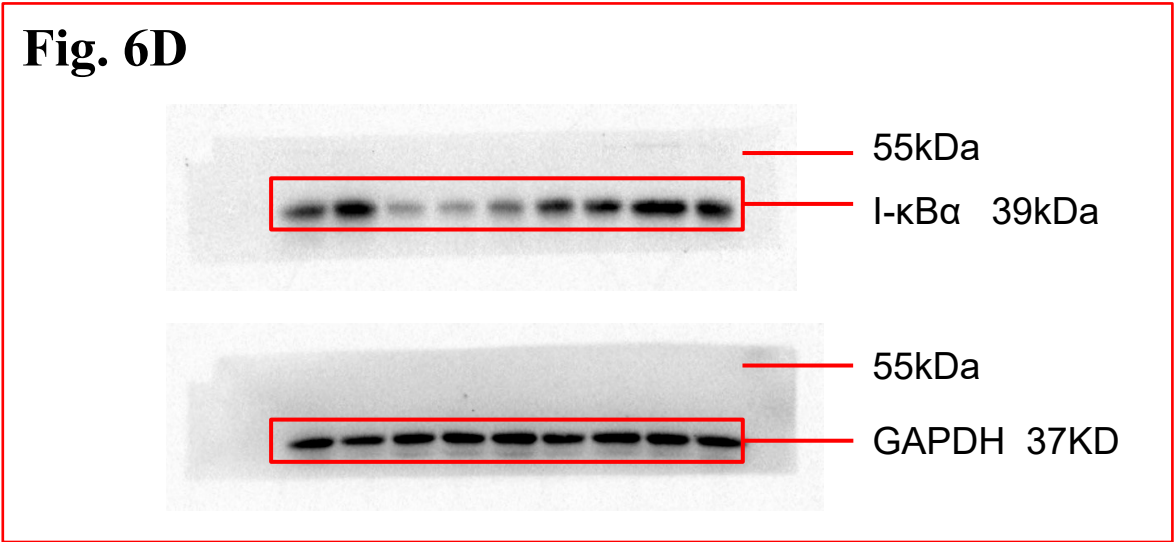



Figure 7

**Fig. 7H**

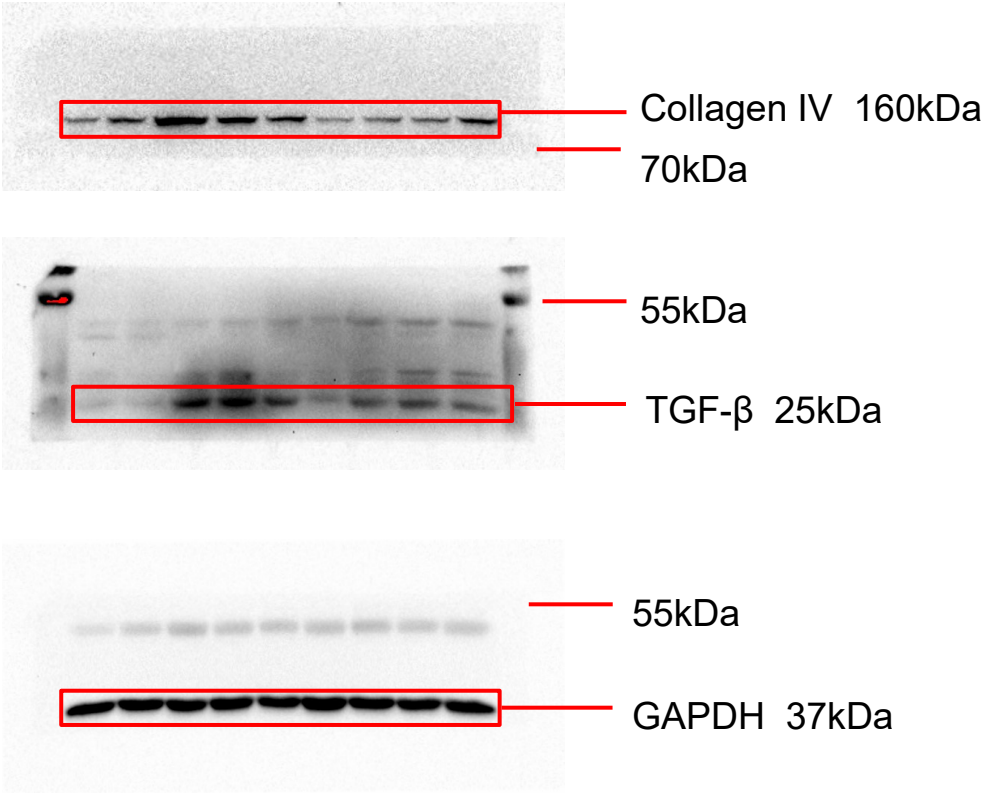

# Supplementary Figure S1

## Fig. S1A

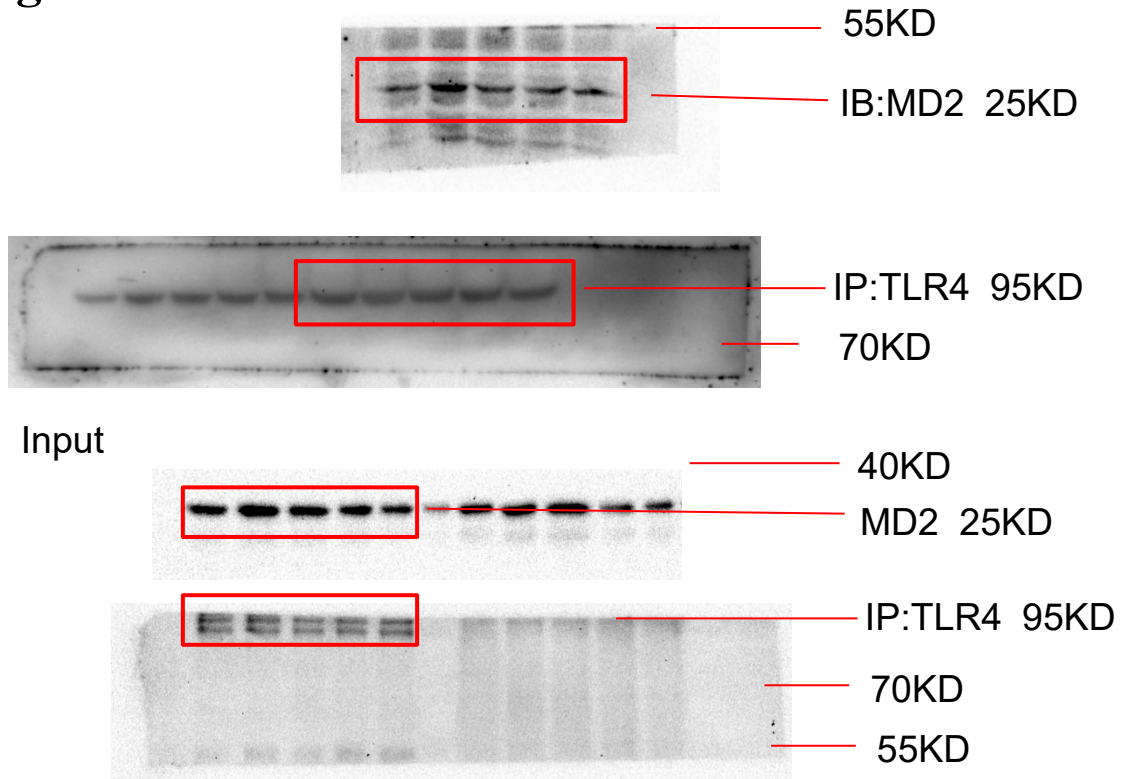

## Fig. S1B

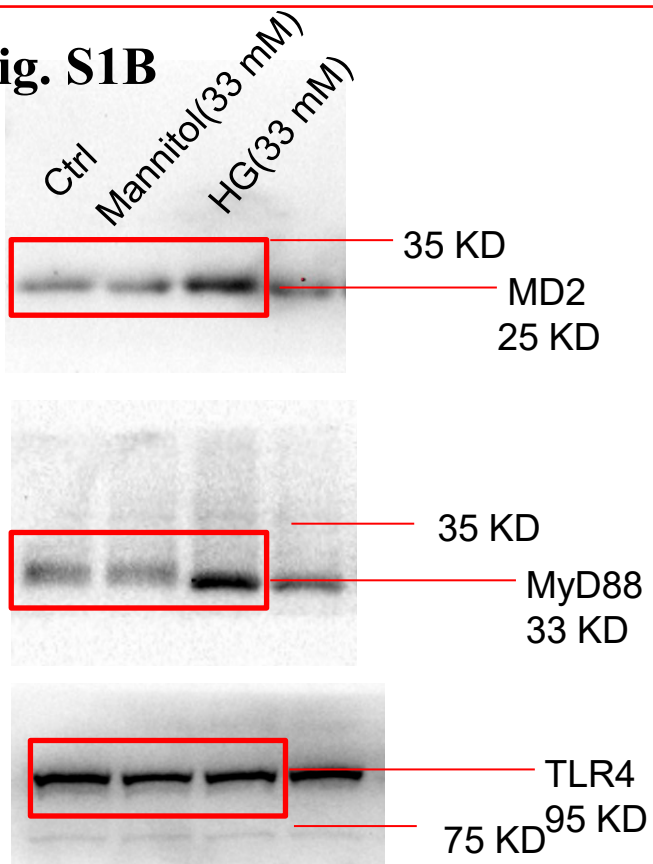

**Fig. S3B**

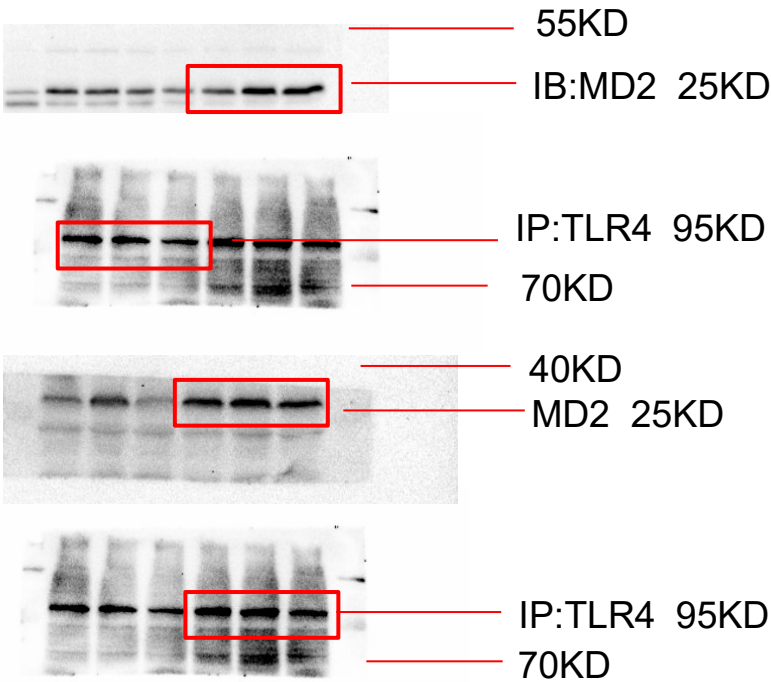

Supplement: 41401_2021_766_MOESM1_ESM.pdf [file 41401_2021_766_MOESM1_ESM.pdf]
